# Supplementary material
Source: publisher site journal article supplement (https://www.dovepress.com/article/317739)
Supplement: Supplementary file 1 [file get_supplementary_file.php]

**Supplementary Material**

**Effect of metabolic health and obesity phenotype on risk of diabetes mellitus: A population-based longitudinal study**

Xiaoyue Zhu, PhD 1; Jingyao Hu, MM 1; Haijian Guo, PhD 2; Dakang Ji, MpH 1; Defu Yuan, MM 1; Mingma Li, MM 1; Tao Yan, MM 1; Chenghao Xue, MpH 1; Haonan Ma, BM 1; Xu Zhou, PhD 1; Yuxiang Liu, PhD 1; You Li, BM 1; Kaicheng Sun, BM 3; Yu Liu, BM 4; Zilin Sun, PhD 5; Bei Wang, PhD 1

1Key Laboratory of Environment Medicine Engineering of Ministry of Education, Department of Epidemiology and Health Statistics, School of Public Health, Southeast University, Nanjing, Jiangsu province, China

2 Integrated Business Management Office, Jiangsu Province Centre for Disease Control and Prevention, Nanjing, Jiangsu province, China

3 Yandu Centre for Disease Control and Prevention, Yancheng, Jiangsu province, China

4 Jurong Centre for Disease Control and Prevention, Jurong, Jiangsu province, China

5 Department of Endocrinology, Institute of Diabetes, Medical School, Southeast University, Nanjing, Jiangsu province, China


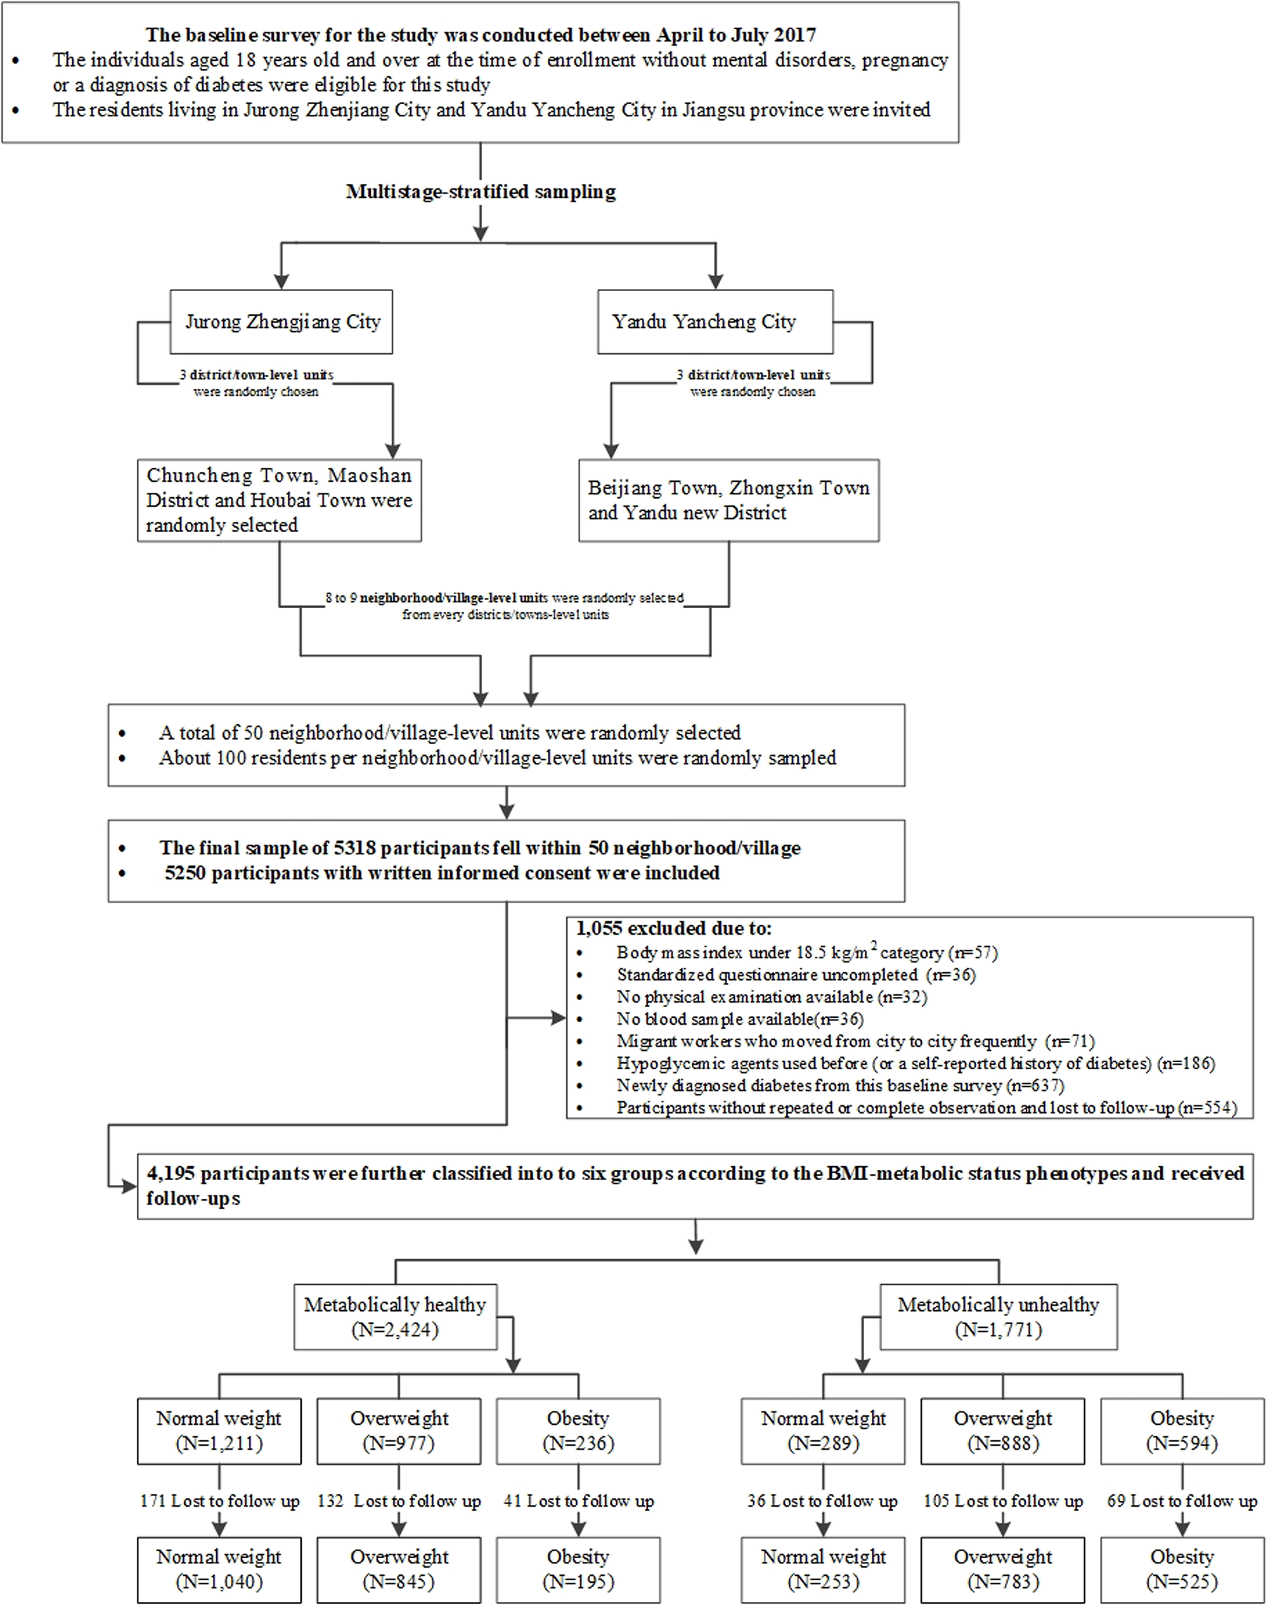


**Figure S1 Participant flowchart of baseline survey**

**
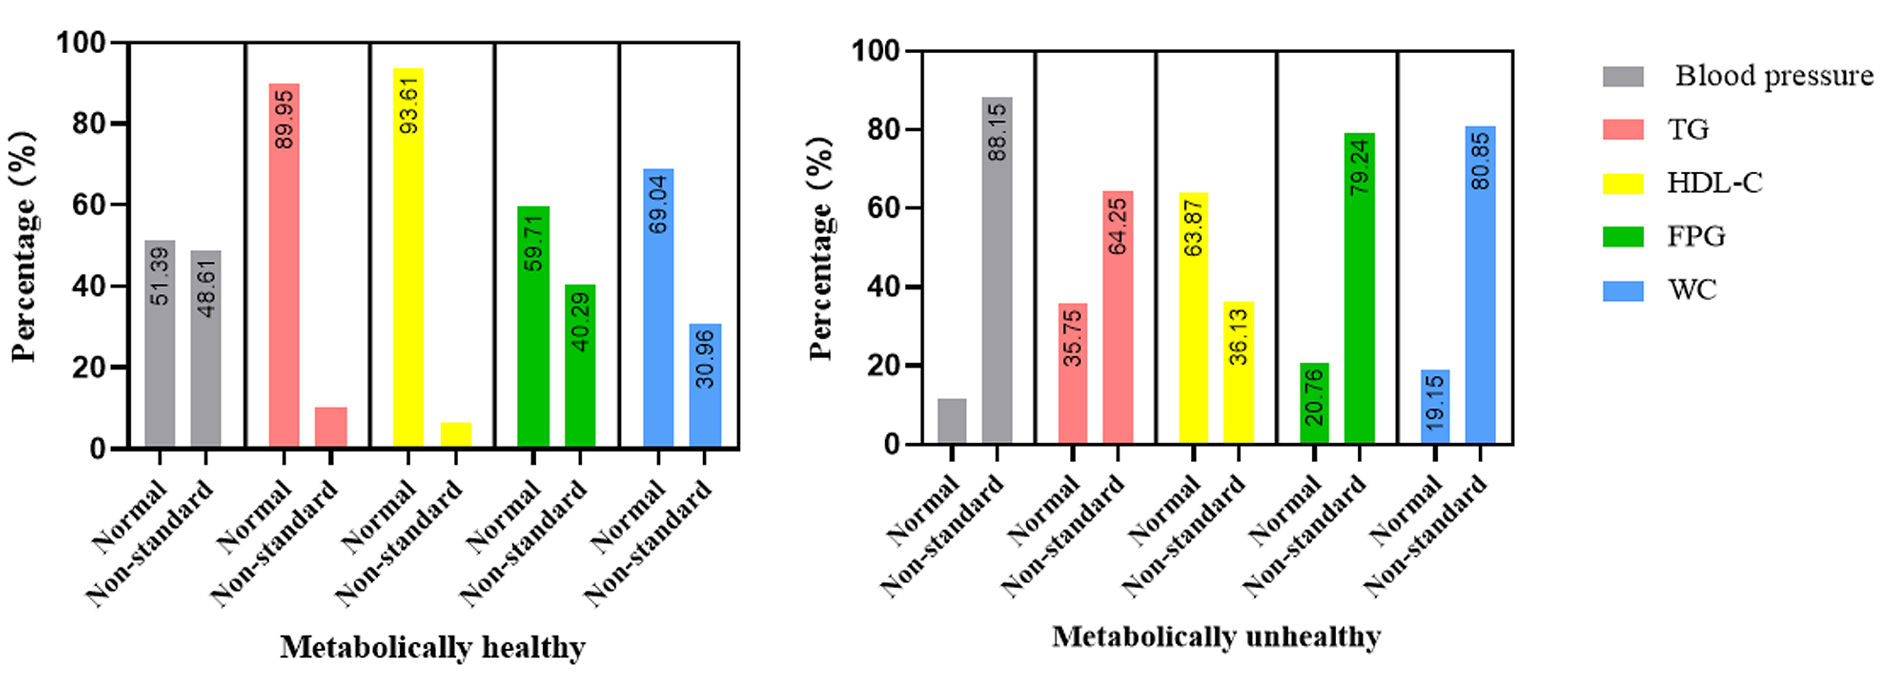
**

**Figure S2 The distribution of criteria for metabolic status at baseline**


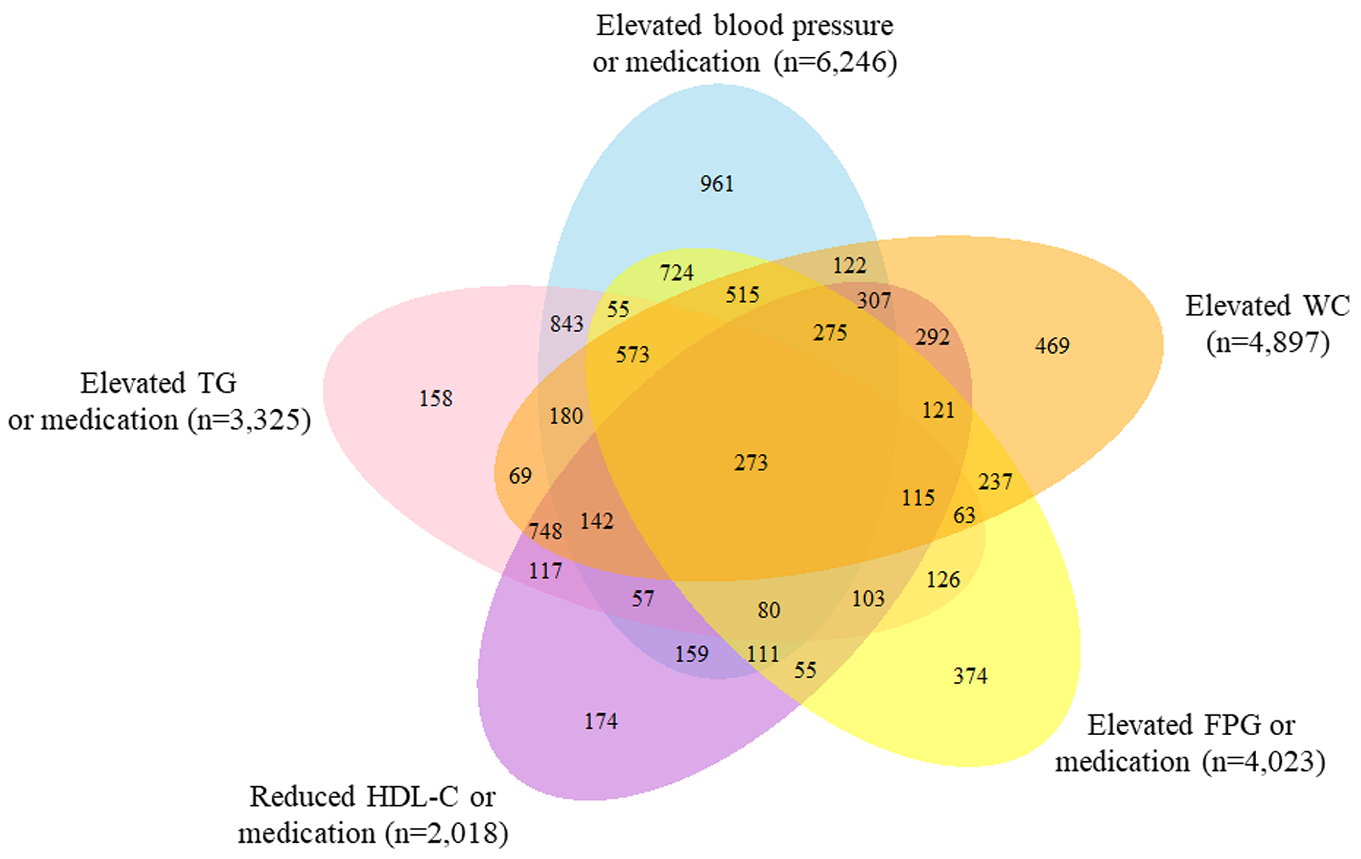


**Figure S3 Venn diagram showing the overlap of the metabolically unhealthy status criteria**

Analysis sample n=9,623

| **Table S1 Estimations of the correlations among outcome measurements at each follow-up times** | | | | |
| --- | --- | --- | --- | --- |
| Outcome measurements | Variables 1 | Variables 2 | r | *P* for Contingency Coefficients |
| FPG level | FPG in 2017 | FPG in 2018 | 0.52 | <0.01 |
|  | FPG in 2017 | FPG in 2020 | 0.44 | <0.01 |
|  | FPG in 2018 | FPG in 2020 | 0.56 | <0.01 |
| 2-h OGTT | 2-h OGTT in 2017 | 2-h OGTT in 2018 | 0.51 | <0.01 |
|  | 2-h OGTT in 2017 | 2-h OGTT in 2020 | 0.49 | <0.01 |
|  | 2-h OGTT in 2018 | 2-h OGTT in 2020 | 0.56 | <0.01 |
| HbA1c (%) | HbA1c in 2017 | HbA1c in 2018 | 0.58 | <0.01 |
|  | HbA1c in 2018 | HbA1c in 2020 | 0.38 | <0.01 |
|  | HbA1c in 2018 | HbA1c in 2020 | 0.42 | <0.01 |
| FPG: Fasting plasma glucose; OGTT: Oral glucose tolerance test; HbA1c: Glycosylated haemoglobin. | | | | |

| **Table S2 Comparison of characteristics at baseline between the study population and people lost to follow-up** | | | | | |
| --- | --- | --- | --- | --- | --- |
| **Variables** | **Study population** |  | **Loss to follow-up** | **F/χ2/Z** | ***P* a** |
| **(N=3,641)** |  | **(N=554)** |
| **Body mass index-metabolic status phenotypes, n (%)** |  |  |  |  |  |
| Metabolically healthy normal weight | 1,040 (28.56) |  | 171 (30.87) | 7.47 | 0.188 |
| Metabolically healthy overweight | 845 (23.21) |  | 132 (23.83) |
| Metabolically healthy obesity | 195 (5.36) |  | 41 (7.40) |
| Metabolically unhealthy normal weight | 253 (6.95) |  | 36 (6.50) |
| Metabolically unhealthy overweight | 783 (21.51) |  | 105 (18.95) |
| Metabolically unhealthy obesity | 525 (14.42) |  | 69 (12.45) |
|  |  |  |  |  |  |
| **Demographic characteristics** |  |  |  |  |  |
| **Age (y), n (%)** |  |  |  |  |  |
| (mean±SD） | 51.61±8.75 |  | 49.20±8.35 | 36.76 | <0.001 |
| <50 | 1,348 (37.02) |  | 283 (51.08) | 44.54 | <0.001 |
| 50-59 | 1,468 (40.32) |  | 193 (34.84) |
| ≥60 | 825 (22.66) |  | 78 (14.08) |
| **Gender, n (%)** |  |  |  |  |  |
| Male | 1,373 (37.71) |  | 227 (40.97) | 2.17 | 0.140 |
| Female | 2,268 (62.29) |  | 327 (59.03) |
| **Education level, n (%)** |  |  |  |  |  |
| Junior high school or below | 3,111 (85.44) |  | 465 (83.94) | 0.87 | 0.351 |
| High school or above | 530 (14.56) |  | 89 (16.06) |
| **Drug history, n (%) b** |  |  |  |  |  |
| No | 2,267 (62.26) |  | 382 (68.95) | 13.21 | 0.001 |
| Yes | 1,226 (33.67) |  | 144 (25.99) |
| Unclear | 148 (4.06) |  | 28 (5.05) |
| **History of chronic disease, n (%) c** |  |  |  |  |  |
| No | 2,140 (58.78) |  | 368 (66.43) | 11.71 | 0.001 |
| Yes | 1,501 (41.22) |  | 186 (33.57) |
| **Family history of diabetes, n (%)** |  |  |  |  |  |
| No | 2,872 (78.88) |  | 436 (78.70) | 0.09 | 0.955 |
| Yes | 617 (16.95) |  | 96 (17.33) |
| Unclear | 152 (4.17) |  | 22 (3.97) |
|  |  |  |  |  |  |
| **Behavioral characteristics** |  |  |  |  |  |
| **Smoking status, n (%)** |  |  |  |  |  |
| Never | 2,794 (76.74) |  | 423 (76.35) | 0.04 | 0.842 |
| Ever | 847 (23.26) |  | 131 (23.65) |
| **Drinking status, n (%)** |  |  |  |  |  |
| Never | 2,708 (74.38) |  | 414 (74.73) | 0.03 | 0.859 |
| Ever | 933 (25.62) |  | 140 (25.27) |
| **Regular physical activity, n (%)** |  |  |  |  |  |
| No | 2,667 (73.25) |  | 413 (74.55) | 0.42 | 0.519 |
| Yes | 974 (26.75) |  | 141 (25.45) |
|  |  |  |  |  |  |
| **Anthropometric characteristics** |  |  |  |  |  |
| **BMI (kg/cm2)** (mean±SD) | 25.42±3.39 |  | 25.23±3.40 | 1.62 | 0.203 |
| **SBP (mmHg)** (mean±SD) | 134.78±19.05 |  | 132.97±19.21 | 4.34 | 0.037 |
| **DBP (mmHg)** (mean±SD) | 82.42±11.33 |  | 82.90±12.01 | 0.81 | 0.368 |
| **WC (cm) d** |  |  |  |  |  |
| (mean±SD) | 84.97±9.25 |  | 84.06±9.65 | 4.69 | 0.031 |
| Normal | 1,735 (47.65) |  | 284 (51.26) | 2.51 | 0.113 |
| Non-standard | 1,906 (52.35) |  | 270 (48.74) |
| **Waist-to-height ratio e** |  |  |  |  |  |
| <0.5 | 1,002 (27.52) |  | 191 (34.48) | 11.43 | 0.001 |
| ≥0.5 | 2,639 (72.48) |  | 363 (65.52) |
| **Waist hip ratio f** |  |  |  |  |  |
| Normal | 1,228 (33.73) |  | 226 (40.79) | 10.60 | 0.001 |
| Non-standard | 2,413 (66.27) |  | 328 (59.21) |
|  |  |  |  |  |  |
| **Biochemical characteristics** |  |  |  |  |  |
| **FPG (mmol/L)** (mean±SD) | 5.68±0.50 |  | 5.63±0.49 | 4.33 | 0.038 |
| **2hPG (mmol/L)** (mean±SD) | 6.87±1.59 |  | 6.88±1.62 | 0.03 | 0.871 |
| **HbA1c (%)** (mean±SD) | 5.34±0.40 |  | 5.31±0.39 | 3.07 | 0.080 |
| **AST (U/L)** (mean±SD) | 25.53±13.58 |  | 23.95±9.28 | 7.06 | 0.008 |
| **ALT (U/L)** (median, IQR) | 18.00 (14.00-26.00) |  | 17.00 (13.00-24.00) | 2.40 | 0.017Ϯ |
| **GGT (U/L)** (median, IQR) | 16.00 (11.00-26.00) |  | 15.00 (10.00-26.00) | 1.58 | 0.115Ϯ |
| **STB (μmol/L)** (mean±SD) | 14.35±5.55 |  | 13.69±5.21 | 6.88 | 0.009 |
| **TC (mmol/L)** (mean±SD) | 4.82±0.94 |  | 4.77±0.93 | 1.65 | 0.199 |
| **LDL-C (mmol/L)** (mean±SD) | 2.63±0.68 |  | 2.61±0.67 | 0.47 | 0.491 |
| **HDL-C (mmol/L)** (mean±SD) | 1.52±0.37 |  | 1.51±0.34 | 0.97 | 0.326 |
| **TG (mmol/L)** (median, IQR) | 1.30 (0.91-1.93) |  | 1.27 (0.89-1.98) | 0.76 | 0.448Ϯ |
| y: Years; N: Number; BMI: Body mass index; SBP: Systolic blood pressure; DBP: Diastolic blood pressure; WC: Waist circumference; FPG: Fasting plasma glucose;2hPG: 2-hour plasma glucose; HbA1c: Glycosylated haemoglobin; AST: Aspartate aminotransferase; ALT: Alanine transaminase; GGT: Gamma glutamyl transferase; STB: Serum total bilirubin; LDL-C: Low-density lipoprotein cholesterol; HDL-C: High-density lipoprotein cholesterol; TC: Total cholesterol; TG: Triglyceride; IQR: Inter-quartile range. | | | | | |
| Data was presented as mean±SD (standard deviation) or median (IQR) for continuous variables when appropriate; number (percentage) for categorical variables. | | | | | |
| Ϯ Wilcoxon rank-sum (Mann-Whitney) test was used to examine the differences of ALT, GGT and TG among six body mass index-metabolic status phenotypes because of heterogeneity of variance. | | | | | |
| a χ2 test, One-way analysis of variance or Wilcoxon rank-sum (Mann-Whitney) test was used to examine the difference. | | | | | |
| b Drugs included antihypertensive agent, antilipemic agent, antithrombotic agent, antineoplastic agent, steroid hormone drugs. | | | | | |
| c History of chronic disease included hypertension, coronary heart disease, dyslipidemia, stroke, kidney disease, hepatic diseases, malignant tumor. | | | | | |
| d WC≤80cm for female or WC≤90cm for male was considered as normal. | | | | | |
| e Waist-to-height ratio≥0.5 was considered as central obesity. | | | | | |
| f Waist-hip ratio<0.85 for female or waist-hip ratio<0.90 for male was considered as normal. | | | | | |

| **Table S3 The association of body mass index-metabolic status phenotypes with diabetes in an analysis stratified by age** | | | | | | | | |
| --- | --- | --- | --- | --- | --- | --- | --- | --- |
| **Age** | **BMI-metabolic status** | **Crude RR**  **(95% CI)** | ***P*** | **Adjusted RR (95% CI) a** | ***P* a** | **Adjusted RR (95% CI) b** | ***P* b** |
| <50 | Metabolically healthy normal weight | Reference |  | Reference |  | Reference |  |
| Metabolically healthy overweight | 0.62 (0.31-1.25) | 0.183 | 0.63 (0.32-1.27) | 0.200 | 0.61 (0.30-1.22) | 0.164 |
| Metabolically healthy obesity | 1.37 (0.56-3.30) | 0.489 | 1.31 (0.56-3.06) | 0.534 | 1.18 (0.53-2.59) | 0.685 |
| Metabolically unhealthy normal weight | 0.76 (0.18-3.19) | 0.715 | 1.07 (0.27-4.22) | 0.928 | 0.81 (0.20-3.36) | 0.772 |
| Metabolically unhealthy overweight | 2.53 (1.45-4.40) | 0.001 | 2.81 (1.61-4.89) | <0.001 | 2.11 (1.20-3.73) | 0.010 |
| Metabolically unhealthy obesity | 3.45 (1.99-5.99) | <0.001 | 3.47 (1.98-6.07) | <0.001 | 2.37 (1.34-4.18) | 0.003 |
| 50-59 | Metabolically healthy normal weight | Reference |  | Reference |  | Reference |  |
| Metabolically healthy overweight | 0.79 (0.49-1.27) | 0.331 | 0.80 (0.49-1.31) | 0.377 | 0.78 (0.48-1.26) | 0.309 |
| Metabolically healthy obesity | 1.05 (0.54-2.04) | 0.893 | 1.06 (0.54-2.08) | 0.859 | 0.98 (0.50-1.93) | 0.958 |
| Metabolically unhealthy normal weight | 1.94 (1.15-3.26) | 0.013 | 2.32 (1.41-3.79) | 0.001 | 2.12 (1.32-3.42) | 0.002 |
| Metabolically unhealthy overweight | 1.86 (1.25-2.77) | 0.002 | 2.22 (1.50-3.30) | <0.001 | 2.01 (1.35-2.99) | 0.001 |
| Metabolically unhealthy obesity | 2.89 (1.94-4.29) | <0.001 | 3.35 (2.25-4.99) | <0.001 | 3.04 (2.02-4.56) | <0.001 |
| ≥60 | Metabolically healthy normal weight | Reference |  | Reference |  | Reference |  |
| Metabolically healthy overweight | 0.52 (0.30-0.91) | 0.022 | 0.55 (0.32-0.96) | 0.036 | 0.53 (0.30-0.91) | 0.022 |
| Metabolically healthy obesity | 0.84 (0.36-2.00) | 0.701 | 0.91 (0.39-2.13) | 0.830 | 0.84 (0.37-1.95) | 0.690 |
| Metabolically unhealthy normal weight | 1.34 (0.75-2.41) | 0.322 | 1.80 (1.02-3.15) | 0.041 | 1.54 (0.88-2.70) | 0.134 |
| Metabolically unhealthy overweight | 1.91 (1.27-2.87) | 0.002 | 2.33 (1.55-3.49) | <0.001 | 1.98 (1.34-2.95) | 0.001 |
| Metabolically unhealthy obesity | 1.75 (1.05-2.91) | 0.032 | 2.14 (1.29-3.56) | 0.003 | 1.71 (1.01-2.89) | 0.046 |
| Results are based on a generalized estimating equation (GEE) with diabetes vs. no diabetes as binary outcome (analysis sample n=9,623); BMI: Body mass index. | | | | | | | | |
| a adjusted for follow-up time and gender. | | | | | | | | |
| b adjusted for follow-up time, demographic characteristics (gender, education level, drug history, history of chronic disease and family history of diabetes) and behavioral characteristics (smoking status, drinking status, regular physical activity). | | | | | | | | |

| **Table S4 The association of body mass index-metabolic status phenotypes with diabetes in an analysis stratified by gender** | | | | | | | |
| --- | --- | --- | --- | --- | --- | --- | --- |
| **Gender** | **BMI-metabolic status** | **Crude RR**  **(95% CI)** | ***P*** | **Adjusted RR (95% CI) a** | ***P* a** | **Adjusted RR (95% CI) b** | ***P* b** |
| Male | Metabolically healthy normal weight | Reference |  | Reference |  | Reference |  |
| Metabolically healthy overweight | 0.53 (0.35-0.82) | 0.004 | 0.57 (0.37-0.87) | 0.009 | 0.54 (0.35-0.82) | 0.004 |
| Metabolically healthy obesity | 0.91 (0.48-1.72) | 0.774 | 0.95 (0.52-1.75) | 0.876 | 0.85 (0.47-1.55) | 0.602 |
| Metabolically unhealthy normal weight | 0.81 (0.35-1.85) | 0.615 | 1.15 (0.55-2.40) | 0.718 | 0.99 (0.47-2.08) | 0.985 |
| Metabolically unhealthy overweight | 1.49 (1.02-2.18) | 0.040 | 1.85 (1.29-2.66) | 0.001 | 1.54 (1.06-2.24) | 0.025 |
| Metabolically unhealthy obesity | 1.77 (1.20-2.60) | 0.004 | 2.10 (1.44-3.07) | <0.001 | 1.73 (1.17-2.57) | 0.006 |
| Female | Metabolically healthy normal weight | Reference |  | Reference |  | Reference |  |
| Metabolically healthy overweight | 0.75 (0.46-1.21) | 0.239 | 0.78 (0.48-1.27) | 0.323 | 0.78 (0.48-1.26) | 0.306 |
| Metabolically healthy obesity | 1.15 (0.61-2.18) | 0.673 | 1.16 (0.61-2.23) | 0.649 | 1.07 (0.55-2.05) | 0.851 |
| Metabolically unhealthy normal weight | 2.47 (1.59-3.85) | <0.001 | 2.68 (1.74-4.14) | <0.001 | 2.42 (1.58-3.73) | <0.001 |
| Metabolically unhealthy overweight | 2.67 (1.86-3.84) | <0.001 | 2.88 (1.99-4.16) | <0.001 | 2.54 (1.76-3.68) | <0.001 |
| Metabolically unhealthy obesity | 3.46 (2.35-5.09) | <0.001 | 3.91 (2.64-5.79) | <0.001 | 3.30 (2.21-4.92) | <0.001 |
| Results are based on a generalized estimating equation (GEE) with diabetes vs. no diabetes as binary outcome (analysis sample n=9,623); BMI: Body mass index. | | | | | | | |
| a adjusted for follow-up time and age (numeric). | | | | | | | |
| b adjusted for follow-up time, demographic characteristics (age (numeric), education level, drug history, history of chronic disease and family history of diabetes) and behavioral characteristics (smoking status, drinking status, regular physical activity). | | | | | | | |

| **Table S5 Risk ratio of sensitivity analysis for diabetes associated with body mass index-metabolic status phenotypes (excluding modified body mass index-metabolic status)** | | | | | | |
| --- | --- | --- | --- | --- | --- | --- |
| **BMI-metabolic status** | **Crude RR**  **(95% CI)** | ***P*** | **Adjusted RR**  **(95% CI) a** | ***P* a** | **Adjusted RR (95% CI) b** | ***P* b** |
| Metabolically healthy normal weight | Reference |  | Reference |  | Reference |  |
| Metabolically healthy overweight | 0.71 (0.44-1.13) | 0.146 | 0.70 (0.44-1.12) | 0.140 | 0.71 (0.44-1.13) | 0.148 |
| Metabolically healthy obesity | 1.09 (0.53-2.23) | 0.816 | 1.16 (0.57-2.40) | 0.681 | 1.06 (0.52-2.20) | 0.867 |
| Metabolically unhealthy normal weight | 2.18 (1.32-3.60) | 0.002 | 2.47 (1.49-4.08) | <0.001 | 2.20 (1.32-3.67) | 0.003 |
| Metabolically unhealthy overweight | 2.87 (2.07-3.97) | <0.001 | 2.90 (2.09-4.03) | <0.001 | 2.46 (1.76-3.44) | <0.001 |
| Metabolically unhealthy obesity | 3.36 (2.41-4.70) | <0.001 | 3.22 (2.30-4.52) | <0.001 | 2.68 (1.90-3.80) | <0.001 |
| *P* for trend | < 0.001 | | | | | |
| Results are based on a generalized estimating equation (GEE) of unmodified BMI-metabolic status with diabetes vs. no diabetes as binary outcome (analysis sample n=4,604); BMI: Body mass index. | | | | | | |
| a adjusted for follow-up time, age (numeric) and gender. | | | | | | |
| b adjusted for follow-up time, demographic characteristics (age (numeric), gender, education level, drug history, history of chronic disease and family history of diabetes) and behavioral characteristics (smoking status, drinking status, regular physical activity). | | | | | | |

| **Table S6 Risk ratio of sensitivity analysis for diabetes associated with body mass index-metabolic status phenotypes (excluding prediabetes participants)** | | | | | | |
| --- | --- | --- | --- | --- | --- | --- |
| **BMI-metabolic status** | **Crude RR**  **(95% CI)** | ***P*** | **Adjusted RR (95% CI) a** | ***P* a** | **Adjusted RR (95% CI) b** | ***P* b** |
| Metabolically healthy normal weight | Reference |  | Reference |  | Reference |  |
| Metabolically healthy overweight | 0.70 (0.52-0.94) | 0.019 | 0.71 (0.53-0.96) | 0.026 | 0.70 (0.52-0.95) | 0.020 |
| Metabolically healthy obesity | 1.14 (0.75-1.73) | 0.551 | 1.16 (0.76-1.76) | 0.494 | 1.06 (0.69-1.60) | 0.802 |
| Metabolically unhealthy normal weight | 2.15 (1.52-3.04) | <0.001 | 2.52 (1.83-3.47) | <0.001 | 2.27 (1.65-3.11) | <0.001 |
| Metabolically unhealthy overweight | 2.78 (2.17-3.55) | <0.001 | 2.93 (2.31-3.71) | <0.001 | 2.55 (2.01-3.25) | <0.001 |
| Metabolically unhealthy obesity | 3.79 (2.93-4.91) | <0.001 | 3.90 (3.03-5.03) | <0.001 | 3.27 (2.52-4.26) | <0.001 |
| *P* for trend | < 0.001 | | | | | |
| Results are based on a generalized estimating equation (GEE) of unmodified BMI-metabolic status with diabetes vs. no diabetes as binary outcome (analysis sample n=6,561); BMI: Body mass index | | | | | | |
| a adjusted for follow-up time, age (numeric) and gender. | | | | | | |
| b adjusted for follow-up time, demographic characteristics (age (numeric), gender, education level, drug history, history of chronic disease and family history of diabetes) and behavioral characteristics (smoking status, drinking status, regular physical activity). | | | | | | |

| **Table S7 The association of body mass index-metabolic status phenotypes with diabetes in analysis stratified by age (excluding unmodified body mass index-metabolic status)** | | | | | | | |
| --- | --- | --- | --- | --- | --- | --- | --- |
| **Age** | **BMI-metabolic status** | **Crude RR**  **(95% CI)** | ***P*** | **Adjusted RR (95% CI) a** | ***P*a** | **Adjusted RR (95% CI) b** | ***P* b** |
| <50 | Metabolically healthy normal weight | Reference |  | Reference |  | Reference |  |
| Metabolically healthy overweight | 0.75 (0.30-1.88) | 0.540 | 0.69 (0.28-1.74) | 0.435 | 0.69 (0.28-1.71) | 0.425 |
| Metabolically healthy obesity | 1.12 (0.26-4.78) | 0.874 | 1.02 (0.23-4.49) | 0.976 | 0.79 (0.17-3.63) | 0.763 |
| Metabolically unhealthy normal weight | NA | NA | NA | NA | NA | NA |
| Metabolically unhealthy overweight | 3.62 (1.71-7.68) | 0.001 | 3.34 (1.49-7.47) | 0.003 | 2.64 (1.21-5.78) | 0.015 |
| Metabolically unhealthy obesity | 3.81 (1.86-7.80) | <0.001 | 3.27 (1.51-7.08) | 0.003 | 2.33 (1.09-5.01) | 0.030 |
| 50-59 | Metabolically healthy normal weight | Reference |  | Reference |  | Reference |  |
| Metabolically healthy overweight | 0.96 (0.48-1.91) | 0.901 | 0.93 (0.46-1.88) | 0.834 | 0.93 (0.46-1.87) | 0.843 |
| Metabolically healthy obesity | 1.35 (0.47-3.94) | 0.577 | 1.37 (0.45-4.14) | 0.580 | 1.28 (0.41-3.97) | 0.669 |
| Metabolically unhealthy normal weight | 2.02 (0.92-4.42) | 0.079 | 2.55 (1.19-5.50) | 0.016 | 2.13 (0.99-4.56) | 0.051 |
| Metabolically unhealthy overweight | 3.11 (1.91-5.06) | <0.001 | 3.37 (2.05-5.52) | <0.001 | 2.98 (1.83-4.86) | <0.001 |
| Metabolically unhealthy obesity | 3.80 (2.39-6.61) | <0.001 | 4.14 (2.48-6.93) | <0.001 | 3.75 (2.27-6.18) | <0.001 |
| ≥60 | Metabolically healthy normal weight | Reference |  | Reference |  | Reference |  |
| Metabolically healthy overweight | 0.48 (0.20-1.13) | 0.094 | 0.50 (0.21-1.18) | 0.111 | 0.48 (0.20-1.15) | 0.100 |
| Metabolically healthy obesity | 0.79 (0.21-2.91) | 0.724 | 0.98 (0.27-3.58) | 0.980 | 0.96 (0.26-3.53) | 0.946 |
| Metabolically unhealthy normal weight | 2.48 (1.24-4.95) | 0.010 | 2.86 (1.38-5.91) | 0.005 | 2.90 (1.48-5.67) | 0.002 |
| Metabolically unhealthy overweight | 2.11 (1.21-3.67) | 0.008 | 2.35 (1.32-4.18) | 0.004 | 2.22 (1.27-3.88) | 0.005 |
| Metabolically unhealthy obesity | 2.50 (1.39-4.48) | 0.002 | 2.33 (1.28-4.25) | 0.006 | 2.03 (1.07-3.85) | 0.030 |
| Results are based on a generalized estimating equation (GEE) of unmodified BMI-metabolic status with diabetes vs. no diabetes as binary outcome (analysis sample n=4,604); BMI: Body mass index; NA: Not available | | | | | | | |
| a adjusted for follow-up time and gender. | | | | | | | |
| b adjusted for follow-up time, demographic characteristics gender, education level, drug history, history of chronic disease and family history of diabetes) and behavioral characteristics (smoking status, drinking status, regular physical activity). | | | | | | | |

| **Table S8 The association of body mass index-metabolic status phenotypes with diabetes in an analysis stratified by age (excluding prediabetes participants)** | | | | | | | |
| --- | --- | --- | --- | --- | --- | --- | --- |
| **Age** | **BMI-metabolic status** | **Crude RR**  **(95% CI)** | ***P*** | **Adjusted RR**  **(95% CI) a** | ***P* a** | **Adjusted RR**  **(95% CI) b** | ***P* b** |
| <50 | Metabolically healthy normal weight | Reference |  | Reference |  | Reference |  |
| Metabolically healthy overweight | 0.67 (0.33-1.34) | 0.257 | 0.72 (0.36-1.44) | 0.355 | 0.73 (0.37-1.44) | 0.361 |
| Metabolically healthy obesity | 1.63 (0.69-3.85) | 0.270 | 1.47 (0.64-3.38) | 0.360 | 1.42 (0.63-3.17) | 0.397 |
| Metabolically unhealthy normal weight | 1.09 (0.27-4.40) | 0.901 | 1.48 (0.39-5.65) | 0.564 | 1.47 (0.39-5.57) | 0.571 |
| Metabolically unhealthy overweight | 3.50 (2.02-6.06) | <0.001 | 3.82 (2.22-6.57) | <0.001 | 3.87 (2.23-6.69) | <0.001 |
| Metabolically unhealthy obesity | 5.61 (3.25-9.68) | <0.001 | 5.05 (2.89-8.82) | <0.001 | 4.81 (2.78-8.33) | <0.001 |
| 50-59 | Metabolically healthy normal weight | Reference |  | Reference |  | Reference |  |
| Metabolically healthy overweight | 0.83 (0.54-1.29) | 0.405 | 0.81 (0.51-1.27) | 0.356 | 0.81 (0.52-1.28) | 0.374 |
| Metabolically healthy obesity | 1.04 (0.55-1.95) | 0.909 | 1.07 (0.57-2.04) | 0.830 | 1.07 (0.56-2.03) | 0.846 |
| Metabolically unhealthy normal weight | 2.47 (1.56-3.90) | <0.001 | 2.83 (1.82-4.41) | <0.001 | 2.80 (1.82-4.32) | <0.001 |
| Metabolically unhealthy overweight | 2.45 (1.69-3.57) | <0.001 | 2.69 (1.86-3.89) | <0.001 | 2.69 (1.86-3.89) | <0.001 |
| Metabolically unhealthy obesity | 4.16 (2.86-6.06) | <0.001 | 4.35 (2.99-6.32) | <0.001 | 4.40 (3.02-6.41) | <0.001 |
| ≥60 | Metabolically healthy normal weight | Reference |  | Reference |  | Reference |  |
| Metabolically healthy overweight | 0.58 (0.35-0.96) | 0.035 | 0.59 (0.36-0.99) | 0.045 | 0.59 (0.35-0.97) | 0.039 |
| Metabolically healthy obesity | 1.06 (0.49-2.28) | 0.884 | 1.07 (0.49-2.31) | 0.867 | 1.06 (0.50-2.28) | 0.873 |
| Metabolically unhealthy normal weight | 1.70 (0.96-3.04) | 0.070 | 2.27 (1.33-3.89) | 0.003 | 2.19 (1.28-3.75) | 0.004 |
| Metabolically unhealthy overweight | 2.74 (1.87-4.03) | <0.001 | 2.97 (2.04-4.32) | <0.001 | 2.82 (1.95-4.10) | <0.001 |
| Metabolically unhealthy obesity | 2.42 (1.50-3.90) | <0.001 | 2.85 (1.79-4.55) | <0.001 | 2.62 (1.62-4.25) | <0.001 |
| Results are based on a generalized estimating equation (GEE) of unmodified BMI-metabolic status with diabetes vs. no diabetes as binary outcome (analysis sample n=6,561); BMI: Body mass index. | | | | | | | |
| a adjusted for follow-up time and gender. | | | | | | | |
| b adjusted for follow-up time, demographic characteristics (gender, education level, drug history, history of chronic disease and family history of diabetes) and behavioral characteristics (smoking status, drinking status, regular physical activity). | | | | | | | |

| **Table S9 The association of body mass index-metabolic status phenotypes with diabetes in an analysis stratified by gender (excluding unmodified BMI-metabolic status)** | | | | | | | |
| --- | --- | --- | --- | --- | --- | --- | --- |
| **Gender** | **BMI-metabolic status** | **Crude RR (95% CI)** | ***P*** | **Adjusted RR (95% CI) a** | ***P* a** | **Adjusted RR (95% CI) b** | ***P* b** |
| Male | Metabolically healthy normal weight | Reference |  | Reference |  | Reference |  |
| Metabolically healthy overweight | 0.68 (0.39-1.21) | 0.190 | 0.69 (0.39-1.25) | 0.225 | 0.70 (0.39-1.26) | 0.233 |
| Metabolically healthy obesity | 0.67 (0.17-2.59) | 0.559 | 0.70 (0.18-2.70) | 0.602 | 0.65 (0.17-2.58) | 0.543 |
| Metabolically unhealthy normal weight | 1.39 (0.36-5.45) | 0.633 | 1.59 (0.41-6.10) | 0.499 | 1.46 (0.38-5.61) | 0.583 |
| Metabolically unhealthy overweight | 2.60 (1.59-4.23) | <0.001 | 2.61 (1.61-4.24) | <0.001 | 2.38 (1.44-3.92) | 0.001 |
| Metabolically unhealthy obesity | 2.35 (1.43-3.85) | 0.001 | 2.30 (1.40-3.78) | 0.001 | 1.96 (1.17-3.29) | 0.011 |
| Female | Metabolically healthy normal weight | Reference |  | Reference |  | Reference |  |
| Metabolically healthy overweight | 0.65 (0.30-1.43) | 0.287 | 0.63 (0.28-1.40) | 0.255 | 0.65 (0.30-1.42) | 0.279 |
| Metabolically healthy obesity | 1.54 (0.66-3.59) | 0.319 | 1.53 (0.64-3.65) | 0.337 | 1.37 (0.56-3.32) | 0.489 |
| Metabolically unhealthy normal weight | 2.83 (1.58-5.05) | <0.001 | 2.83 (1.56-5.12) | 0.001 | 2.26 (1.23-4.16) | 0.009 |
| Metabolically unhealthy overweight | 3.25 (2.07-5.09) | <0.001 | 3.04 (1.89-4.88) | <0.001 | 2.54 (1.58-4.08) | <0.001 |
| Metabolically unhealthy obesity | 4.38 (2.75-6.99) | <0.001 | 4.02 (2.46-6.56) | <0.001 | 3.15 (1.90-5.21) | <0.001 |
| Results are based on a generalized estimating equation (GEE) of unmodified BMI-metabolic status with diabetes vs. no diabetes as binary outcome (analysis sample n=4,604); BMI: Body mass index; | | | | | | | |
| a adjusted for follow-up time and age (numeric). | | | | | | | |
| b adjusted for follow-up time, demographic characteristics (age (numeric), education level, drug history, history of chronic disease and family history of diabetes) and behavioral characteristics (smoking status, drinking status, regular physical activity). | | | | | | | |

| **Table S10 The association of body mass index-metabolic status phenotypes with diabetes in an analysis stratified by gender (excluding prediabetes participants)** | | | | | | | |
| --- | --- | --- | --- | --- | --- | --- | --- |
| **Gender** | **BMI-metabolic status** | **Crude RR (95% CI)** | ***P*** | **Adjusted RR (95% CI) a** | ***P* a** | **Adjusted RR (95% CI) b** | ***P* b** |
| Male | Metabolically healthy normal weight | Reference |  | Reference |  | Reference |  |
| Metabolically healthy overweight | 0.58 (0.39-0.88) | 0.010 | 0.61 (0.41-0.92) | 0.017 | 0.59 (0.39-0.88) | 0.009 |
| Metabolically healthy obesity | 1.03 (0.56-1.87) | 0.930 | 1.02 (0.57-1.82) | 0.949 | 0.89 (0.50-1.58) | 0.691 |
| Metabolically unhealthy normal weight | 1.04 (0.46-2.32) | 0.933 | 1.54 (0.77-3.07) | 0.221 | 1.32 (0.66-2.62) | 0.430 |
| Metabolically unhealthy overweight | 2.04 (1.41-2.94) | <0.001 | 2.28 (1.62-3.21) | <0.001 | 1.88 (1.32-2.69) | 0.001 |
| Metabolically unhealthy obesity | 2.38 (1.64-3.46) | <0.001 | 2.61 (1.83-3.73) | <0.001 | 2.14 (1.48-3.10) | <0.001 |
| Female | Metabolically healthy normal weight | Reference |  | Reference |  | Reference |  |
| Metabolically healthy overweight | 0.82 (0.53-1.25) | 0.350 | 0.81 (0.52-1.26) | 0.351 | 0.81 (0.52-1.27) | 0.352 |
| Metabolically healthy obesity | 1.24 (0.69-2.22) | 0.476 | 1.24 (0.67-2.28) | 0.496 | 1.14 (0.61-2.11) | 0.680 |
| Metabolically unhealthy normal weight | 3.29 (2.19-4.93) | <0.001 | 3.38 (2.27-5.03) | <0.001 | 3.01 (2.02-4.49) | <0.001 |
| Metabolically unhealthy overweight | 3.69 (2.63-5.18) | <0.001 | 3.64 (2.58-5.14) | <0.001 | 3.17 (2.23-4.51) | <0.001 |
| Metabolically unhealthy obesity | 5.52 (3.83-7.95) | <0.001 | 5.50 (3.80-7.97) | <0.001 | 4.82 (3.31-7.02) | <0.001 |
| Results are based on a generalized estimating equation (GEE) of unmodified BMI-metabolic status with diabetes vs. no diabetes as binary outcome (analysis sample n=6,561); BMI: Body mass index. | | | | | | | |
| a adjusted for follow-up time and age (numeric). | | | | | | | |
| b adjusted for follow-up time, demographic characteristics (age (numeric), education level, drug history, history of chronic disease and family history of diabetes) and behavioral characteristics (smoking status, drinking status, regular physical activity). | | | | | | | |
